# Supplementary material for: S-type Dissolved Oxygen Distribution along Water Depth in a Canyon-shaped and Algae Blooming Water Source Reservoir: Reasons and Control
Source: Int J Environ Res Public Health. 2019 Mar 19;16(6):987. doi: 10.3390/ijerph16060987 (PMC6466274; doi:10.3390/ijerph16060987)
Supplement: Supplementary file 1 [file ijerph-16-00987-s001.pdf]

# S-type Dissolved Oxygen Distribution Along Water Depth in a Canyon-shaped and Algae Blooming Water Source Reservoir: Reasons and Control

Yuwei Huang <sup>1</sup>, Chun Yang <sup>1</sup>, Chengcheng Wen <sup>2,3</sup> and Gang Wen <sup>2,3,\*</sup>

<sup>1</sup> Faculty of Urban Construction and Environmental Engineering, Chongqing University, Chongqing, 400444, PR China; huang.fade@foxmail.com (Y.H.); c.yang@cqu.edu.cn (C.Y.)

<sup>2</sup> Key Laboratory of Northwest Water Resource, Environment and Ecology, MOE, Xi'an University of Architecture and Technology, Xi'an, 710055, PR China; hitchengchengwen@163.com

<sup>3</sup> Shaanxi Key Laboratory of Environmental Engineering, Xi'an University of Architecture and Technology, Xi'an, 710055, PR China

\* Correspondence: hitwengang@163.com Tel.: +86-29-82207886; Fax: +86-29-82202729

## List of Contents

**Figure S1.** Seasonal DO depth profile of S2 site in Lijiahe Reservoir from April to December in 2017

**Figure S2.** Seasonal DO depth profile of S3 site in Lijiahe Reservoir from April to September in 2017

**Figure S3.** Seasonal DO depth profile of S2 site in Lijiahe Reservoir in 2018

**Figure S4.** Seasonal DO depth profile of S3 site in Lijiahe Reservoir from April to September in 2018

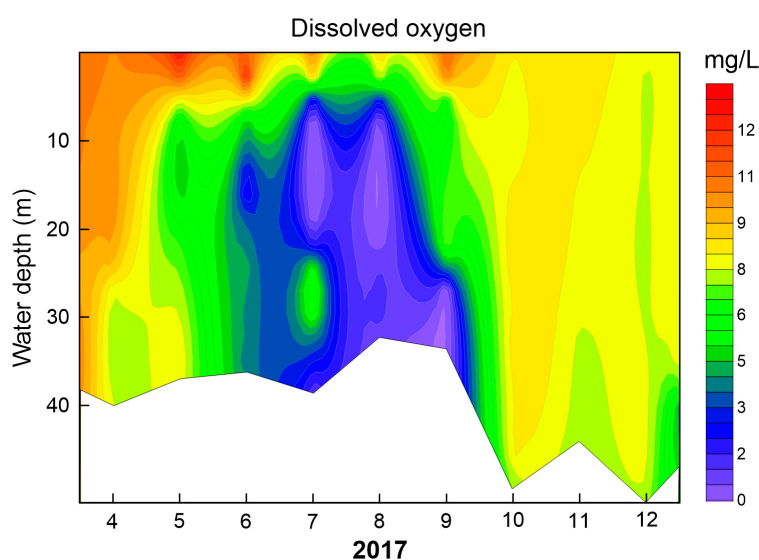

**Figure S1.** Seasonal DO depth profile of S2 site in Lijiahe Reservoir from April to December in 2017.

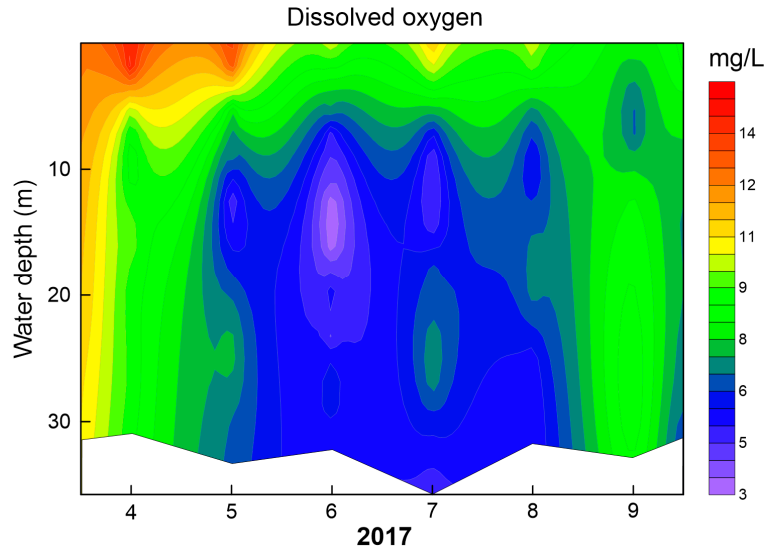

**Figure S2.** Seasonal DO depth profile of S3 site in Lijiahe Reservoir from April to September in 2017.

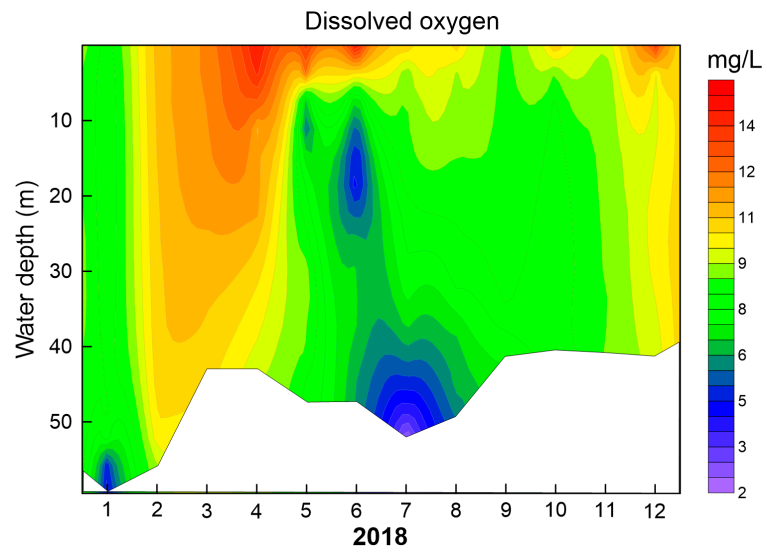

**Figure S3.** Seasonal DO depth profile of S2 site in Lijiahe Reservoir in 2018.

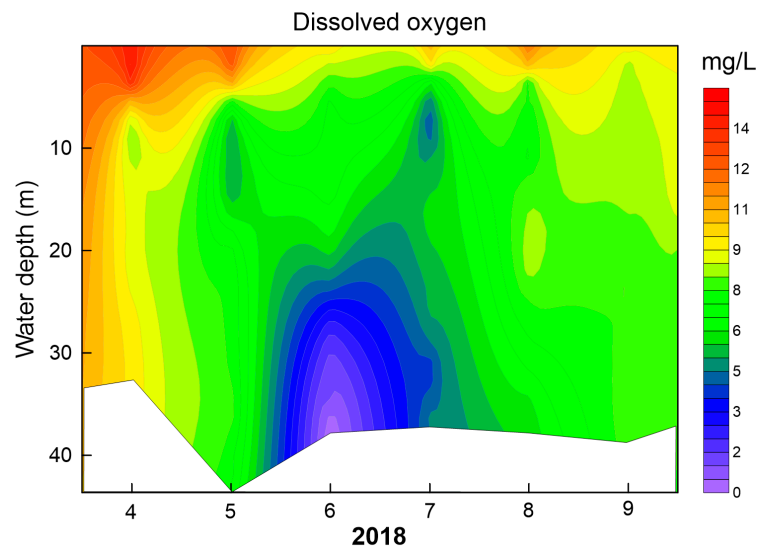

**Figure S4.** Seasonal DO depth profile of S3 site in Lijiahe Reservoir from April to September in 2018.
